# Supplementary material
Source: Research Square preprint supplement (doi:10.21203/rs.3.rs-9608748/v1)
Supplement: Supplementary file 1 [file 1e5256be29bcdc9482961b2d.xlsx]

## Sheet: S1
TableS1: Microsatellite primers and reference for primer discovery.
PrimerName	Primer	Source
Svi 6eF	AGTCGACTTATGTAGAGTGC	Eldridge et al. 2002
Svi 6eR	GATCAACTGTGGAGGATGAGC	Eldridge et al. 2002
Svi 4-1	NED-ACAAATGCGGGCTGCTGTTC	Borer et al. 1998
Svi 4-2	GATCGCGGCACAGATGTATTG	Borer et al. 1998
Svi 14bF	6FAM-TGTGTGGCCCTTGGTCAGG	Eldridge et al. 2002
Svi 14bR	ATCTGAGGAGTATTACCGG	Eldridge et al. 2002
Svi 2F	6-FAM-CAACCAGACCCAATCCCTTG	Eldridge et al. 2002
Svi 2R	GGGCCGAGTATATCAGTTAAC	Eldridge et al. 2002
SviL 4F	HEX-CGTGGCCAGAAAATTTTGATG	Wirth et al. 1999
SviL 4R	GCTATATGTAGTAGGGGGTC	Wirth et al. 1999
Svi 18-1	6FAM-GATCTGTAAACTCCAGCGTG	Borer et al. 1998
Svi 18-2	CTTAAGCTGCTCAGCATCCAGG	Borer et al. 1998
SviL 11F	5HEX-AGGGTATGGCATGATAAG	Wirth et al. 1999
SviL 11R	CTCTACATTTCATCAGACAG	Wirth et al. 1999
Svi 26F	5HEX-CGAACTACTTATCTTCTGGC	Borer et al. 1998
Svi 26R	GTAAGTGTGAATCAGCCAGAC	Borer et al. 1998
SviL 2cF	6FAM-GTTTTAAGACATAAACATACTCTGTA	Cena et al. 2006
SviL 2cR	ACAAGTGTGTTAGCCAATCAT	Cena et al. 2006
SviL 7F	NED-GATGTGCATACATTTACTCC	Wirth et al. 1999
SviL 7R	GCTTTAATCTGCTGAGAAC	Wirth et al. 1999
SviL 6F	NED-AGAGGAAGAAGAGGTATC	Wirth et al. 1999
SviL 6R	TTAAAGGGTAAGTCCACTG	Wirth et al. 1999
SviL 8F	6FAM-GCTTATACGTCGTTCTTATG	Wirth et al. 1999
SviL 8R	ATGGAGAAGCAAGTTGAG	Wirth et al. 1999
SviL 5F	6FAM-CATATCCTACTGTAGTATGG	Wirth et al. 1999
SviL 5R	CAAATCCCATTTACACCCAC	Wirth et al. 1999
SviL 3F	NED-GAGTTTATGAGTTGGAACGC	Wirth et al. 1999
SviL 3R	GATGTAAATGATGGAACAGG	Wirth et al. 1999

## Sheet: S2
Table S2: Microsatellite primer multiplex reactions used for amplification and genotyping.
MP1
Reagent	label	[Stock ]	[Units]	[Desired]
Buffer		5	X	1
dNTP's		10	mM Each	0.2
BSA		2	ug/ml	0.2
MgCl2		25	mM Each	0.5
Svi 6 F	NED	10	uM	0.19
Svi 6 R		10	uM	0.19
Svi 4 F	6-FAM	10	uM	0.06
Svi 4 R		10	uM	0.06
Svi 14b F	6-FAM	10	uM	0.31
Svi 14b R		10	uM	0.31
Svi 2y F	NED	10	uM	0.06
Svi 2y R		10	uM	0.06
Taq		5	U/uL	0.025
DNA		6	ng/uL	12
MP2
Reagent	label	[Stock ]	[Units]	[Desired]
Buffer		5	X	1
dNTP's		10	mM Each	0.2
MgCl2		25	mM Each	0.5
BSA		2	ug/ml	0.2
Svi L 4 F	HEX	10	uM	0.3
Svi L 4 R		10	uM	0.3
Taq		5	U/uL	0.025
DNA		6	ng/uL	12
MP3
Reagent	label	[Stock ]	[Units]	[Desired]
Buffer		5	X	1
dNTP's		10	mM Each	0.2
MgCl2		25	mM Each	0.5
BSA		2	ug/ml	0.2
SviL18 F	6-FAM	10	uM	0.2
SviL18 R		10	uM	0.2
SviL11 F	HEX	10	uM	0.2
SviL11 R		10	uM	0.2
Taq		5	U/uL	0.025
DNA		6	ng/uL	12
MP4
Reagent	label	[Stock ]	[Units]	[Desired]
Buffer		5	X	1
dNTP's		10	mM Each	0.2
MgCl2		25	mM Each	0.5
BSA		2	ug/ml	0.2
SviL3 F	NED	10	uM	0.2
SviL3 R		10	uM	0.2
Taq		5	U/uL	0.025
DNA		6	ng/uL	12
MP5
Reagent	label	[Stock ]	[Units]	[Desired]
Buffer		5	X	1
dNTP's		10	mM Each	0.2
MgCl2		25	mM Each	0.5
BSA		2	ug/ml	0.2
Svi26 F	HEX	10	uM	0.2
Svi26 R		10	uM	0.2
SviL2c F	6-FAM	10	uM	0.2
SviL2c R		10	uM	0.2
Taq		5	U/uL	0.025
DNA		6	ng/uL	12
MP6
Reagent	label	[Stock ]	[Units]	[Desired]
Buffer		5	X	1
dNTP's		10	mM Each	0.2
BSA		2	ug/ml	0.2
MgCl2		25	mM Each	0.5
SviL 7y F	NED	10	uM	0.3
SviL 7y R		10	uM	0.3
SviL 6 F	NED	10	uM	0.35
SviL 6 R		10	uM	0.35
SviL 8 F	6-FAM	10	uM	0.2
SviL 8 R		10	uM	0.2
Svi 7 F	HEX	10	uM	0.175
Svi 7 R		10	uM	0.175
Taq		5	U/uL	0.025
DNA		6	ng/uL	12
MP7
Reagent	label	[Stock ]	[Units]	[Desired]
Buffer		5	X	1
dNTP's		10	mM Each	0.2
MgCl2		25	mM Each	0.5
BSA		2	ug/ml	0.2
Svi L 5 F	6-FAM	10	uM	0.3
Svi L 5 R		10	uM	0.3
Taq		5	U/uL	0.025
DNA		6	ng/uL	12

## Sheet: S3
Table S3: Summary of runs of homozygosity analysis conducted using Rapture sequencing data for all individuals. Individuals with DOC < 10x were removed prior to analysis.
SITE	Site	FID	IID	PHE	NSEG	KB	KBAVG	GENOME	FROH	MEANSNPDEN	STDFROH	INDV	N_SITES	MEAN_DEPTH
C_LA	Lamoille	C_LA_wall_L1.sorted	C_LA_wall_L1.sorted	-9	33	107275	3250.76	791703	0.135499	0.1114	1.21633	C_LA_wall_L1.sorted	87718	37.0628
C_LA	Lamoille	C_LA_wall_L10.sorted	C_LA_wall_L10.sorted	-9	31	93212.1	3006.84	791703	0.117736	0.1114	1.05688	C_LA_wall_L10.sorted	87670	22.2981
C_LA	Lamoille	C_LA_wall_L11.sorted	C_LA_wall_L11.sorted	-9	4	10044.8	2511.2	791703	0.0126876	0.1114	0.113892	C_LA_wall_L11.sorted	87723	24.1546
C_LA	Lamoille	C_LA_wall_L12.sorted	C_LA_wall_L12.sorted	-9	35	127555	3644.43	791703	0.161115	0.1114	1.44627	C_LA_wall_L12.sorted	87470	23.6198
C_LA	Lamoille	C_LA_wall_L2.sorted	C_LA_wall_L2.sorted	-9	0	0	0	791703	0	0.1114	0	C_LA_wall_L2.sorted	51992	3.21992
C_LA	Lamoille	C_LA_wall_L3.sorted	C_LA_wall_L3.sorted	-9	7	12519.5	1788.5	791703	0.0158134	0.1114	0.141951	C_LA_wall_L3.sorted	87749	27.6054
C_LA	Lamoille	C_LA_wall_L4.sorted	C_LA_wall_L4.sorted	-9	33	115421	3497.59	791703	0.145788	0.1114	1.30869	C_LA_wall_L4.sorted	87771	25.9469
C_LA	Lamoille	C_LA_wall_L5.sorted	C_LA_wall_L5.sorted	-9	2	4601.72	2300.86	791703	0.00581243	0.1114	0.0521762	C_LA_wall_L5.sorted	87426	16.4472
C_LA	Lamoille	C_LA_wall_L6.sorted	C_LA_wall_L6.sorted	-9	6	10006.7	1667.79	791703	0.0126395	0.1114	0.11346	C_LA_wall_L6.sorted	86306	10.0615
C_LA	Lamoille	C_LA_wall_L7.sorted	C_LA_wall_L7.sorted	-9	6	13174.2	2195.69	791703	0.0166403	0.1114	0.149375	C_LA_wall_L7.sorted	87686	25.5729
C_LA	Lamoille	C_LA_wall_L8.sorted	C_LA_wall_L8.sorted	-9	33	77974.2	2362.86	791703	0.0984892	0.1114	0.884104	C_LA_wall_L8.sorted	87750	24.1929
C_LA	Lamoille	C_LA_wall_L9.sorted	C_LA_wall_L9.sorted	-9	38	111496	2934.09	791703	0.140831	0.1114	1.26419	C_LA_wall_L9.sorted	87745	26.2208
C_MI	Missisquoi	C_MI_wall81.sorted	C_MI_wall81.sorted	-9	4	5726.41	1431.6	791703	0.00723303	0.1114	0.0649285	C_MI_wall81.sorted	87634	43.6704
C_MI	Missisquoi	C_MI_wall82.sorted	C_MI_wall82.sorted	-9	1	2847.48	2847.48	791703	0.00359665	0.1114	0.0322859	C_MI_wall82.sorted	87198	32.5286
C_MI	Missisquoi	C_MI_wall83.sorted	C_MI_wall83.sorted	-9	3	6321.49	2107.16	791703	0.00798468	0.1114	0.0716757	C_MI_wall83.sorted	87108	18.4767
C_MI	Missisquoi	C_MI_wall84.sorted	C_MI_wall84.sorted	-9	4	7551.34	1887.84	791703	0.0095381	0.1114	0.0856203	C_MI_wall84.sorted	87509	26.0884
C_MI	Missisquoi	C_MI_wall87.sorted	C_MI_wall87.sorted	-9	3	6086.92	2028.97	791703	0.00768839	0.1114	0.0690161	C_MI_wall87.sorted	87229	23.6139
C_MI	Missisquoi	C_MI_wall88.sorted	C_MI_wall88.sorted	-9	3	5130.37	1710.12	791703	0.00648017	0.1114	0.0581703	C_MI_wall88.sorted	87280	19.9401
C_MI	Missisquoi	C_MI_wall89.sorted	C_MI_wall89.sorted	-9	5	8910.15	1782.03	791703	0.0112544	0.1114	0.101027	C_MI_wall89.sorted	87553	28.1228
C_MI	Missisquoi	C_MI_wall90.sorted	C_MI_wall90.sorted	-9	2	3726.58	1863.29	791703	0.00470704	0.1114	0.0422535	C_MI_wall90.sorted	86954	25.3572
C_MI	Missisquoi	C_MI_wall93.sorted	C_MI_wall93.sorted	-9	8	11189.6	1398.7	791703	0.0141336	0.1114	0.126872	C_MI_wall93.sorted	84750	11.1937
C_MI	Missisquoi	C_MI_wall94.sorted	C_MI_wall94.sorted	-9	8	13749	1718.62	791703	0.0173664	0.1114	0.155892	C_MI_wall94.sorted	87626	39.5846
C_MI	Missisquoi	C_MI_wall95.sorted	C_MI_wall95.sorted	-9	5	9921.17	1984.23	791703	0.0125314	0.1114	0.11249	C_MI_wall95.sorted	87385	27.2879
C_MI	Missisquoi	C_MI_wall96.sorted	C_MI_wall96.sorted	-9	1	2089.83	2089.83	791703	0.00263966	0.1114	0.0236954	C_MI_wall96.sorted	86460	14.1628
C_PO	Poultney	C_PO_wall_p1.sorted	C_PO_wall_p1.sorted	-9	31	90009.6	2903.54	791703	0.113691	0.1114	1.02057	C_PO_wall_p1.sorted	85252	12.5425
C_PO	Poultney	C_PO_wall_p10.sorted	C_PO_wall_p10.sorted	-9	35	128803	3680.1	791703	0.162691	0.1114	1.46042	C_PO_wall_p10.sorted	87602	28.4306
C_PO	Poultney	C_PO_wall_p11.sorted	C_PO_wall_p11.sorted	-9	7	15399.1	2199.87	791703	0.0194506	0.1114	0.174601	C_PO_wall_p11.sorted	87572	27.1034
C_PO	Poultney	C_PO_wall_p12.sorted	C_PO_wall_p12.sorted	-9	9	38464.5	4273.83	791703	0.0485845	0.1114	0.436127	C_PO_wall_p12.sorted	87309	26.5781
C_PO	Poultney	C_PO_wall_p2.sorted	C_PO_wall_p2.sorted	-9	0	0	0	791703	0	0.1114	0	C_PO_wall_p2.sorted	86201	25.0692
C_PO	Poultney	C_PO_wall_p3.sorted	C_PO_wall_p3.sorted	-9	40	140554	3513.84	791703	0.177534	0.1114	1.59366	C_PO_wall_p3.sorted	87454	24.7759
C_PO	Poultney	C_PO_wall_p4.sorted	C_PO_wall_p4.sorted	-9	0	0	0	791703	0	0.1114	0	C_PO_wall_p4.sorted	86945	34.335
C_PO	Poultney	C_PO_wall_p5.sorted	C_PO_wall_p5.sorted	-9	16	45978.7	2873.67	791703	0.0580757	0.1114	0.521326	C_PO_wall_p5.sorted	87382	29.4651
C_PO	Poultney	C_PO_wall_p6.sorted	C_PO_wall_p6.sorted	-9	7	18015.5	2573.65	791703	0.0227554	0.1114	0.204267	C_PO_wall_p6.sorted	87597	29.745
C_PO	Poultney	C_PO_wall_p7.sorted	C_PO_wall_p7.sorted	-9	20	48982.9	2449.15	791703	0.0618703	0.1114	0.555389	C_PO_wall_p7.sorted	86309	14.0038
C_PO	Poultney	C_PO_wall_p8.sorted	C_PO_wall_p8.sorted	-9	27	69145.7	2560.95	791703	0.0873379	0.1114	0.784003	C_PO_wall_p8.sorted	87476	23.1148
C_PO	Poultney	C_PO_wall_p9.sorted	C_PO_wall_p9.sorted	-9	2	5698.14	2849.07	791703	0.00719732	0.1114	0.0646079	C_PO_wall_p9.sorted	86979	17.9489
C_WI	Winooski	C_WI_wall46.sorted	C_WI_wall46.sorted	-9	2	3059.01	1529.5	791703	0.00386384	0.1114	0.0346843	C_WI_wall46.sorted	86896	13.8419
C_WI	Winooski	C_WI_wall47.sorted	C_WI_wall47.sorted	-9	8	14653.5	1831.69	791703	0.0185088	0.1114	0.166148	C_WI_wall47.sorted	87571	21.4116
C_WI	Winooski	C_WI_wall49.sorted	C_WI_wall49.sorted	-9	0	0	0	791703	0	0.1114	0	C_WI_wall49.sorted	74351	4.7515
C_WI	Winooski	C_WI_wall50.sorted	C_WI_wall50.sorted	-9	4	6654.97	1663.74	791703	0.00840589	0.1114	0.0754569	C_WI_wall50.sorted	87602	27.7474
C_WI	Winooski	C_WI_wall51.sorted	C_WI_wall51.sorted	-9	5	14452	2890.4	791703	0.0182543	0.1114	0.163863	C_WI_wall51.sorted	87459	18.0647
C_WI	Winooski	C_WI_wall52.sorted	C_WI_wall52.sorted	-9	3	3509.81	1169.94	791703	0.00443324	0.1114	0.0397957	C_WI_wall52.sorted	87555	34.994
C_WI	Winooski	C_WI_wall53.sorted	C_WI_wall53.sorted	-9	13	27329.3	2102.26	791703	0.0345196	0.1114	0.309871	C_WI_wall53.sorted	87510	29.4653
C_WI	Winooski	C_WI_wall54.sorted	C_WI_wall54.sorted	-9	0	0	0	791703	0	0.1114	0	C_WI_wall54.sorted	74570	4.90176
C_WI	Winooski	C_WI_wall55.sorted	C_WI_wall55.sorted	-9	3	5870.5	1956.83	791703	0.00741503	0.1114	0.0665622	C_WI_wall55.sorted	83647	7.44255
C_WI	Winooski	C_WI_wall56.sorted	C_WI_wall56.sorted	-9	2	5212.41	2606.2	791703	0.0065838	0.1114	0.0591005	C_WI_wall56.sorted	87432	22.4421
C_WI	Winooski	C_WI_wall59.sorted	C_WI_wall59.sorted	-9	28	77810.5	2778.95	791703	0.0982825	0.1114	0.882248	C_WI_wall59.sorted	84803	7.72736
C_WI	Winooski	C_WI_wall60.sorted	C_WI_wall60.sorted	-9	2	3171.14	1585.57	791703	0.00400547	0.1114	0.0359557	C_WI_wall60.sorted	86212	13.0836
E_SA	Sandusky	E_SA_18_00503.sorted	E_SA_18_00503.sorted	-9	6	8135.45	1355.91	791703	0.0102759	0.1576	0.0652023	E_SA_18_00503.sorted	124342	26.2683
E_SA	Sandusky	E_SA_18_00510.sorted	E_SA_18_00510.sorted	-9	4	6122.42	1530.6	791703	0.00773323	0.1576	0.0490687	E_SA_18_00510.sorted	124333	20.6864
E_SA	Sandusky	E_SA_18_00504.sorted	E_SA_18_00504.sorted	-9	3	4839.61	1613.2	791703	0.00611291	0.1576	0.0387875	E_SA_18_00504.sorted	124184	16.2111
E_SA	Sandusky	E_SA_18_00501.sorted	E_SA_18_00501.sorted	-9	3	3283.83	1094.61	791703	0.00414781	0.1576	0.0263186	E_SA_18_00501.sorted	124230	14.2475
E_SA	Sandusky	E_SA_18_00502.sorted	E_SA_18_00502.sorted	-9	2	2774.68	1387.34	791703	0.0035047	0.1576	0.0222379	E_SA_18_00502.sorted	124309	24.6707
E_SA	Sandusky	E_SA_18_00507.sorted	E_SA_18_00507.sorted	-9	0	0	0	791703	0	0.1576	0	E_SA_18_00507.sorted	123888	9.85333
E_SA	Sandusky	E_SA_18_00511.sorted	E_SA_18_00511.sorted	-9	0	0	0	791703	0	0.1576	0	E_SA_18_00511.sorted	14159	1.6629
E_SA	Sandusky	E_SA_18_00508.sorted	E_SA_18_00508.sorted	-9	1	1074.8	1074.8	791703	0.00135758	0.1576	0.00861409	E_SA_18_00508.sorted	124274	23.3761
E_SA	Sandusky	E_SA_18_00506.sorted	E_SA_18_00506.sorted	-9	1	1039.38	1039.38	791703	0.00131284	0.1576	0.00833021	E_SA_18_00506.sorted	124293	17.1972
E_SA	Sandusky	E_SA_18_00505.sorted	E_SA_18_00505.sorted	-9	0	0	0	791703	0	0.1576	0	E_SA_18_00505.sorted	124071	17.5738
E_SA	Sandusky	E_SA_18_00509.sorted	E_SA_18_00509.sorted	-9	0	0	0	791703	0	0.1576	0	E_SA_18_00509.sorted	123921	15.9707
E_SA	Sandusky	E_SA_18_00512.sorted	E_SA_18_00512.sorted	-9	0	0	0	791703	0	0.1576	0	E_SA_18_00512.sorted	124111	14.1435
H_TR	Tittabawassee	H_TR_19_26130.sorted	H_TR_19_26130.sorted	-9	16	43544.9	2721.55	791703	0.0550016	0.1576	0.348995	H_TR_19_26130.sorted	122369	15.6503
H_TR	Tittabawassee	H_TR_19_26132.sorted	H_TR_19_26132.sorted	-9	10	31078.4	3107.84	791703	0.0392551	0.1576	0.249081	H_TR_19_26132.sorted	121826	13.9556
H_TR	Tittabawassee	H_TR_19_26127.sorted	H_TR_19_26127.sorted	-9	13	30660.5	2358.5	791703	0.0387273	0.1576	0.245731	H_TR_19_26127.sorted	122242	14.8673
H_TR	Tittabawassee	H_TR_19_26125.sorted	H_TR_19_26125.sorted	-9	12	22819.6	1901.64	791703	0.0288234	0.1576	0.18289	H_TR_19_26125.sorted	123220	19.3998
H_TR	Tittabawassee	H_TR_19_26124.sorted	H_TR_19_26124.sorted	-9	4	11360.6	2840.15	791703	0.0143496	0.1576	0.0910506	H_TR_19_26124.sorted	122626	15.6351
H_TR	Tittabawassee	H_TR_19_26133.sorted	H_TR_19_26133.sorted	-9	4	8343.63	2085.91	791703	0.0105388	0.1576	0.0668708	H_TR_19_26133.sorted	123353	19.5927
H_TR	Tittabawassee	H_TR_19_26123.sorted	H_TR_19_26123.sorted	-9	5	7044.69	1408.94	791703	0.00889815	0.1576	0.0564603	H_TR_19_26123.sorted	123452	21.6946
H_TR	Tittabawassee	H_TR_19_26129.sorted	H_TR_19_26129.sorted	-9	4	6696.48	1674.12	791703	0.00845833	0.1576	0.0536696	H_TR_19_26129.sorted	121801	13.12
H_TR	Tittabawassee	H_TR_19_26126.sorted	H_TR_19_26126.sorted	-9	5	6692.37	1338.47	791703	0.00845313	0.1576	0.0536366	H_TR_19_26126.sorted	123206	18.7715
H_TR	Tittabawassee	H_TR_19_26135.sorted	H_TR_19_26135.sorted	-9	2	2121.98	1060.99	791703	0.00268027	0.1576	0.0170068	H_TR_19_26135.sorted	123152	19.851
H_TR	Tittabawassee	H_TR_19_26131.sorted	H_TR_19_26131.sorted	-9	1	1075.87	1075.87	791703	0.00135893	0.1576	0.00862266	H_TR_19_26131.sorted	121698	18.5597
H_TR	Tittabawassee	H_TR_19_26134.sorted	H_TR_19_26134.sorted	-9	0	0	0	791703	0	0.1576	0	H_TR_19_26134.sorted	122942	19.2606
W_KS	Cedar Bluff	W_KS_19.sorted	W_KS_19.sorted	-9	8	18668.2	2333.52	791703	0.0235798	0.2008	0.117429	W_KS_19.sorted	156033	18.3485
W_KS	Cedar Bluff	W_KS_10.sorted	W_KS_10.sorted	-9	9	18128.2	2014.25	791703	0.0228977	0.2008	0.114033	W_KS_10.sorted	157734	26.7984
W_KS	Cedar Bluff	W_KS_18.sorted	W_KS_18.sorted	-9	8	11873	1484.12	791703	0.0149968	0.2008	0.0746852	W_KS_18.sorted	157557	27.3966
W_KS	Cedar Bluff	W_KS_1.sorted	W_KS_1.sorted	-9	5	7206.96	1441.39	791703	0.00910311	0.2008	0.0453342	W_KS_1.sorted	157774	28.1084
W_KS	Cedar Bluff	W_KS_12.sorted	W_KS_12.sorted	-9	4	5372.47	1343.12	791703	0.00678597	0.2008	0.0337947	W_KS_12.sorted	154821	14.9423
W_KS	Cedar Bluff	W_KS_11.sorted	W_KS_11.sorted	-9	2	2746.96	1373.48	791703	0.00346969	0.2008	0.0172793	W_KS_11.sorted	142483	9.10076
W_KS	Cedar Bluff	W_KS_16.sorted	W_KS_16.sorted	-9	0	0	0	791703	0	0.2008	0	W_KS_16.sorted	138069	8.74676
W_KS	Cedar Bluff	W_KS_17.sorted	W_KS_17.sorted	-9	2	2602.07	1301.03	791703	0.00328668	0.2008	0.0163679	W_KS_17.sorted	156029	17.0928
W_KS	Cedar Bluff	W_KS_2.sorted	W_KS_2.sorted	-9	2	2372.49	1186.25	791703	0.00299669	0.2008	0.0149238	W_KS_2.sorted	157639	27.7875
W_KS	Cedar Bluff	W_KS_15.sorted	W_KS_15.sorted	-9	1	1601.56	1601.56	791703	0.00202293	0.2008	0.0100744	W_KS_15.sorted	154514	17.614
W_KS	Cedar Bluff	W_KS_13.sorted	W_KS_13.sorted	-9	1	1165.88	1165.88	791703	0.00147262	0.2008	0.00733378	W_KS_13.sorted	155358	15.9408
W_KS	Cedar Bluff	W_KS_14.sorted	W_KS_14.sorted	-9	1	1083.65	1083.65	791703	0.00136876	0.2008	0.00681653	W_KS_14.sorted	156408	18.7852
W_SC	Winnipeg	W_SC_12.sorted	W_SC_12.sorted	-9	8	15134.6	1891.83	791703	0.0191165	0.2279	0.0838812	W_SC_12.sorted	179247	19.5638
W_SC	Winnipeg	W_SC_18.sorted	W_SC_18.sorted	-9	7	13116.8	1873.82	791703	0.0165678	0.2279	0.0726978	W_SC_18.sorted	179887	31.7507
W_SC	Winnipeg	W_SC_17.sorted	W_SC_17.sorted	-9	4	6736.7	1684.18	791703	0.00850913	0.2279	0.0373371	W_SC_17.sorted	179554	26.2143
W_SC	Winnipeg	W_SC_13.sorted	W_SC_13.sorted	-9	5	6475.58	1295.12	791703	0.00817931	0.2279	0.0358899	W_SC_13.sorted	177299	13.412
W_SC	Winnipeg	W_SC_15.sorted	W_SC_15.sorted	-9	4	6369.99	1592.5	791703	0.00804594	0.2279	0.0353047	W_SC_15.sorted	176399	25.5327
W_SC	Winnipeg	W_SC_16.sorted	W_SC_16.sorted	-9	5	6272.99	1254.6	791703	0.00792341	0.2279	0.0347671	W_SC_16.sorted	175849	15.1226
W_SC	Winnipeg	W_SC_10.sorted	W_SC_10.sorted	-9	5	6189.26	1237.85	791703	0.00781766	0.2279	0.034303	W_SC_10.sorted	179174	19.32
W_SC	Winnipeg	W_SC_2.sorted	W_SC_2.sorted	-9	4	5935.57	1483.89	791703	0.00749722	0.2279	0.032897	W_SC_2.sorted	172957	10.0401
W_SC	Winnipeg	W_SC_1.sorted	W_SC_1.sorted	-9	0	0	0	791703	0	0.2279	0	W_SC_1.sorted	159795	6.97474
W_SC	Winnipeg	W_SC_11.sorted	W_SC_11.sorted	-9	4	5332.33	1333.08	791703	0.00673527	0.2279	0.0295536	W_SC_11.sorted	177919	14.6232
W_SC	Winnipeg	W_SC_14.sorted	W_SC_14.sorted	-9	2	2431.91	1215.95	791703	0.00307175	0.2279	0.0134785	W_SC_14.sorted	177981	15.6651
W_SC	Winnipeg	W_SC_19.sorted	W_SC_19.sorted	-9	1	1247.29	1247.29	791703	0.00157545	0.2279	0.00691291	W_SC_19.sorted	178865	20.5415
